# Supplementary material
Source: Research Square preprint supplement (doi:10.21203/rs.3.rs-8961206/v1)
Supplement: Supplementary file 1 [file 31ef4e3f76046b9179652f05.docx]

**Supplementary Information**

This file provides a brief description of supplementary tables and files included with the submission.

Table S1. Full 90 drug–event screening results (CSV). Contains ROR, 95% CI, Fisher p-value, and Benjamini–Hochberg FDR q-value for all 10 drugs × 9 cardiac outcomes.

Table S2a. Sex-stratified screening results (Male; CSV).

Table S2b. Sex-stratified screening results (Female; CSV).

Table S3. FDR-validated signals under a stricter minimum count threshold (a ≥ 5; CSV).

Analysis pipeline. The included Python script documents the end-to-end workflow (data ingestion, de-duplication logic, cohort restriction to primary-suspect drugs, disproportionality analysis with continuity correction and FDR control, and anomaly detection using Isolation Forest).

Note: The cardiac outcome list included a priori contained 'HEART FAILURE' as a preferred term; this term was not observed in the provided analytic cohort extract and is retained in Table S1 for completeness (all corresponding counts are zero).
